# Supplementary material for: Loss of Peroxiredoxin IV Protects Mice from Azoxymethane/Dextran Sulfate Sodium-Induced Colorectal Cancer Development
Source: MDPI journal article supplement (doi:10.3390/antiox12030677), 2023-03-09
Supplement: s1 [file s1]

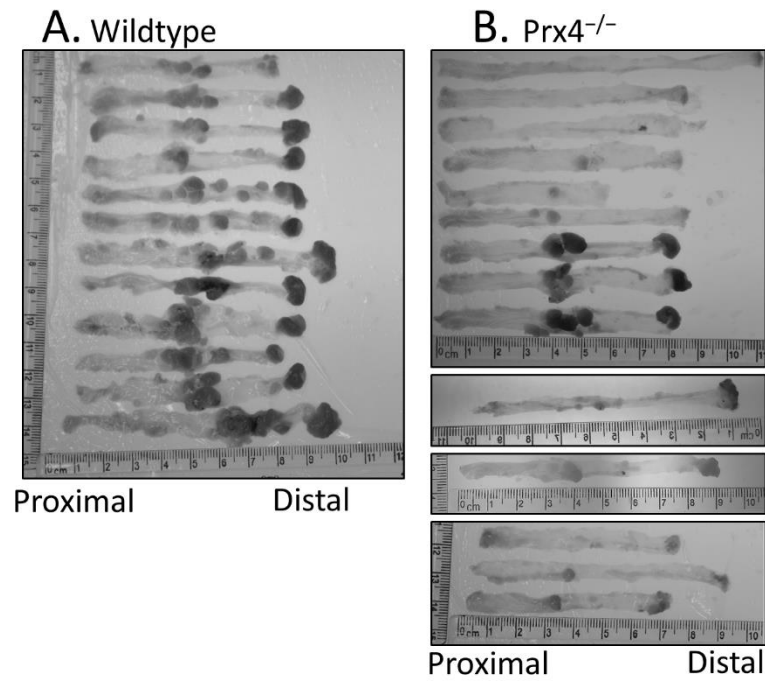

Figure S1. Gross images of colons extracted from AOM/DSS treated (A) wildtype and (B) Prx4 knockout mice.

A.

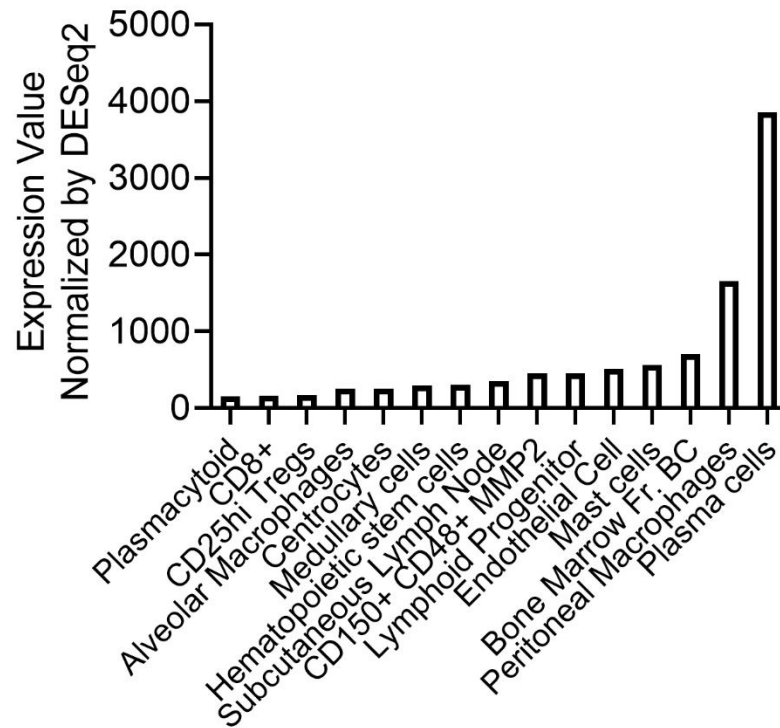

| Population Full Name                                                     | Population Sorting Description                                                                                  |
|--------------------------------------------------------------------------|-----------------------------------------------------------------------------------------------------------------|
| Splenic Plasmacytoid                                                     | sorted on CD45lo CD11b+                                                                                         |
| Splenic CD8+                                                             | sorted on CD45+ MHCII+ CD11c+ CD8+ CD4-                                                                         |
| Splenic CD25hi Tregs                                                     | sorted on CD4+CD8-TCRbhiCD62LhiCD44loCD25hiDump-                                                                |
| Alveolar Macrophages                                                     | sorted on CD45+ CD11c+ SiglecF+                                                                                 |
| Splenic Germinal Center Centrococytes                                    | sorted on CD19+B220+IgD-Fas+CD38-CXCR4lo CD86hi                                                                 |
| Thymic Medullary Epithelial cells, MHCIIhi                               | sorted on CD45-Ly51loMHC-IIhiEPCAMhi                                                                            |
| Bone Marrow 34- LTHSC/Bone Marrow 34- Long Term hematopoietic stem cells | sorted on Lin-Sca1+ckit+CD135-CD150+CD48-CD34-                                                                  |
| Subcutaneous Lymph Node                                                  | sorted on CD45- CD31- PDPN- ITGA7+                                                                              |
| Bone Marrow CD150+ CD48+ MMP2                                            |                                                                                                                 |
| Bone Marrow Common Lymphoid Progenitor                                   | sorted on LIN-CD93+CD117+IL7Ra+CD45R-                                                                           |
| Subcutaneous Lymph Node Lymphatic                                        |                                                                                                                 |
| Endothelial Cell                                                         | sorted on CD45- CD31+ PDPN+                                                                                     |
| Peritoneal Mast cells                                                    |                                                                                                                 |
| Bone Marrow Fr. BC (Pro-B)                                               | sorted on CD93+IgM-CD19+CD43+HSA+                                                                               |
| Peritoneal Macrophages                                                   | sorted on F4/80+ICAM2+CD5-CD19-CD43-                                                                            |
| Splenic Plasma cells                                                     | 6 week old C57BL/6J BLIMP1-GFP mice sorted on GFP <sup>hi</sup> CD138+ MHCIIlo (dump: NK1.1- TCRb- Gr1- CD11b-) |

Figure S2. (A) Bioinformatics analysis of RNA sequencing dataset using Immgen shows high expression of Prx4 in peritoneal macrophages and splenic plasma cells of 6 week old C57BL/6J mice.

A.

|   | 1         | 2 | 3       | 4 | 5           | 6 | 7     | 8 | 9      | 10 | 11                   | 12 | 13             | 14 | 15    | 16 | 17     | 18 | 19 | 20        |
|---|-----------|---|---------|---|-------------|---|-------|---|--------|----|----------------------|----|----------------|----|-------|----|--------|----|----|-----------|
| A | Reference |   |         |   |             |   |       |   |        |    |                      |    |                |    |       |    |        |    |    | Reference |
| B |           |   | 6Ckine  |   | BLC         |   | C10   |   | C5/C5a |    | CCL28                |    | Chemerin       |    | CTACK |    | CXCL16 |    |    |           |
| C |           |   | Eotaxin |   | Fractalkine |   | IL-16 |   | IP-10  |    | I-TAC                |    | JE             |    | KC    |    | LIX    |    |    |           |
| D |           |   | MCP-2   |   | MCP-5       |   | MDC   |   | MIG    |    | MIP-1 $\alpha/\beta$ |    | MIP-1 $\gamma$ |    | MIP-2 |    | RANTES |    |    |           |
| E |           |   | SDF-1   |   | Adipsin     |   | Gp130 |   | HSP60  |    | Control (-)          |    |                |    |       |    |        |    |    |           |
| F | Reference |   |         |   |             |   |       |   |        |    |                      |    |                |    |       |    |        |    |    |           |

B.

|   | 1          | 2 | 3           | 4            | 5            | 6                  | 7            | 8      | 9            | 10      | 11             | 12                  | 13     | 14     | 15    | 16     | 17              | 18        | 19          | 20    | 21         | 22        | 23          | 24 |
|---|------------|---|-------------|--------------|--------------|--------------------|--------------|--------|--------------|---------|----------------|---------------------|--------|--------|-------|--------|-----------------|-----------|-------------|-------|------------|-----------|-------------|----|
| A | Reference  |   | Acrcp30     | Amphiregulin |              | Angpt1             |              | Angpt2 |              | Angptl3 |                | BAFF                |        | C1q R1 |       | CCL2   |                 | CCL3/CCL4 |             | CCL5  |            | Reference |             |    |
| B |            |   | CCL6        | CCL11        |              | CCL12              |              | CCL17  |              | CCL19   |                | CCL20               |        | CCL21  |       | CCL22  |                 | CD14      |             | CD40  |            |           |             |    |
| C |            |   | CD160       | Chemerin     |              | Chitinase 3-like 1 |              | CD142  |              | C5/C5a  |                | Complement Factor D |        | CRP    |       | CX3CL1 |                 | CXCL1     |             | CXCL2 |            |           |             |    |
| D | CXCL9      |   | CXCL10      |              | CXCL11       |                    | CXCL13       |        | CXCL16       |         | Cystatin C     |                     | DKK-1  |        | CD26  |        | EGF             |           | Endoglin    |       | Endostatin |           | Fetuin A    |    |
| E | FGF acidic |   | FGF-21      |              | Flt-3 Ligand |                    | Gas 6        |        | G-CSF        |         | GDF-15         |                     | GM-CSF |        | HGF   |        | ICAM-1/CD54     |           | IFN-γ       |       | IGFBP-1    |           | IGFBP-2     |    |
| F | IGFBP-3    |   | IGFBP-5     |              | IGFBP-6      |                    | IL-1α/IL-1F1 |        | IL-1β/IL-1F2 |         | IL-1ra/IL-1F3  |                     | IL-2   |        | IL-3  |        | IL-4            |           | IL-5        |       | IL-6       |           | IL-7        |    |
| G | IL-10      |   | IL-11       |              | IL-12 p40    |                    | IL-13        |        | IL-15        |         | IL-17A         |                     | IL-22  |        | IL-23 |        | IL-27 p28       |           | IL-28A/B    |       | IL-33      |           | LDL R       |    |
| H | Leptin     |   | LIF         |              | Lipocalin-2  |                    | LIX          |        | M-CSF        |         | MMP-2          |                     | MMP-3  |        | MMP-9 |        | Myeloperoxidase |           | Osteopontin |       | TNFRSF11B  |           | PD-ECGF     |    |
| I | PDGF-BB    |   | Pentraxin 2 |              | Pentraxin 3  |                    | Periostin    |        | Pref-1       |         | Proliferin     |                     | PCSK9  |        | RAGE  |        | RBP4            |           | Reg3G       |       | Resistin   |           |             |    |
| J | Reference  |   | E-Selectin  |              | P-Selectin   |                    | Serpin E1    |        | Serpin F1    |         | Thrombopoietin |                     | TIM-1  |        | TNF-α |        | VCAM-1          |           | VEGF        |       | WISP-1     |           | Control (-) |    |

Figure S3. Layout of Proteome profiler mouse chemokine (A) and cytokine (B) arrays adapted from manufacturer's datasheet.

A.

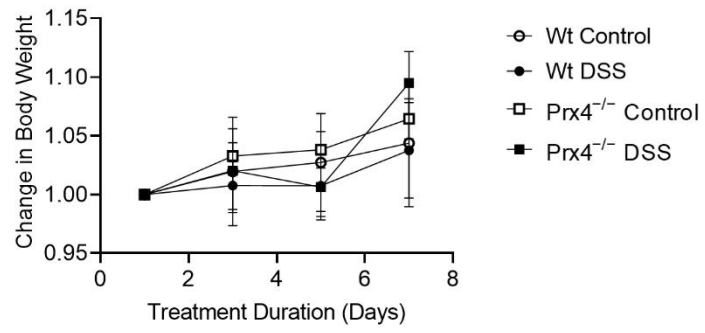

B.

CD86

Wt

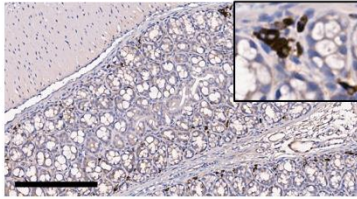

Prx4<sup>-/-</sup>

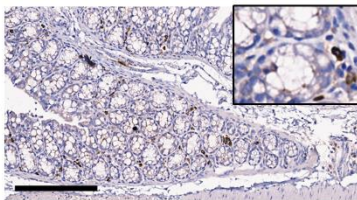

D.

CD163

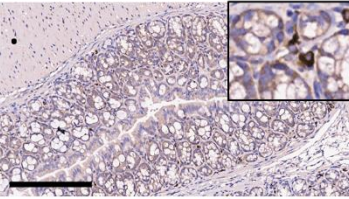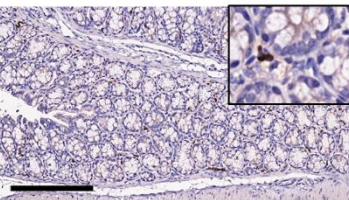

F.

CD138

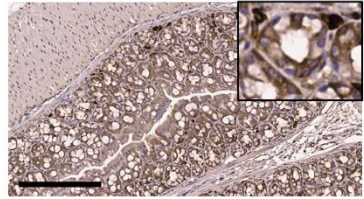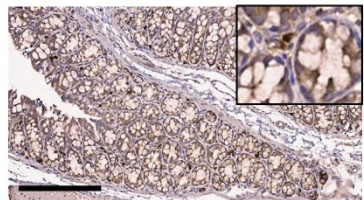

C.

CD86

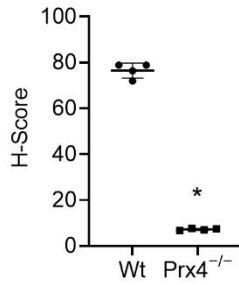

E.

CD163

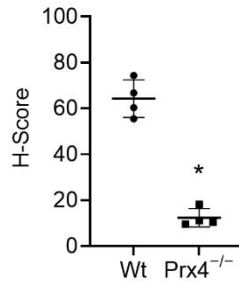

G.

CD138

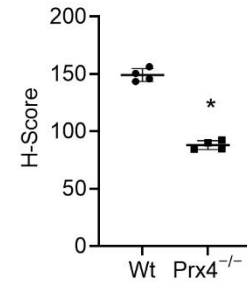

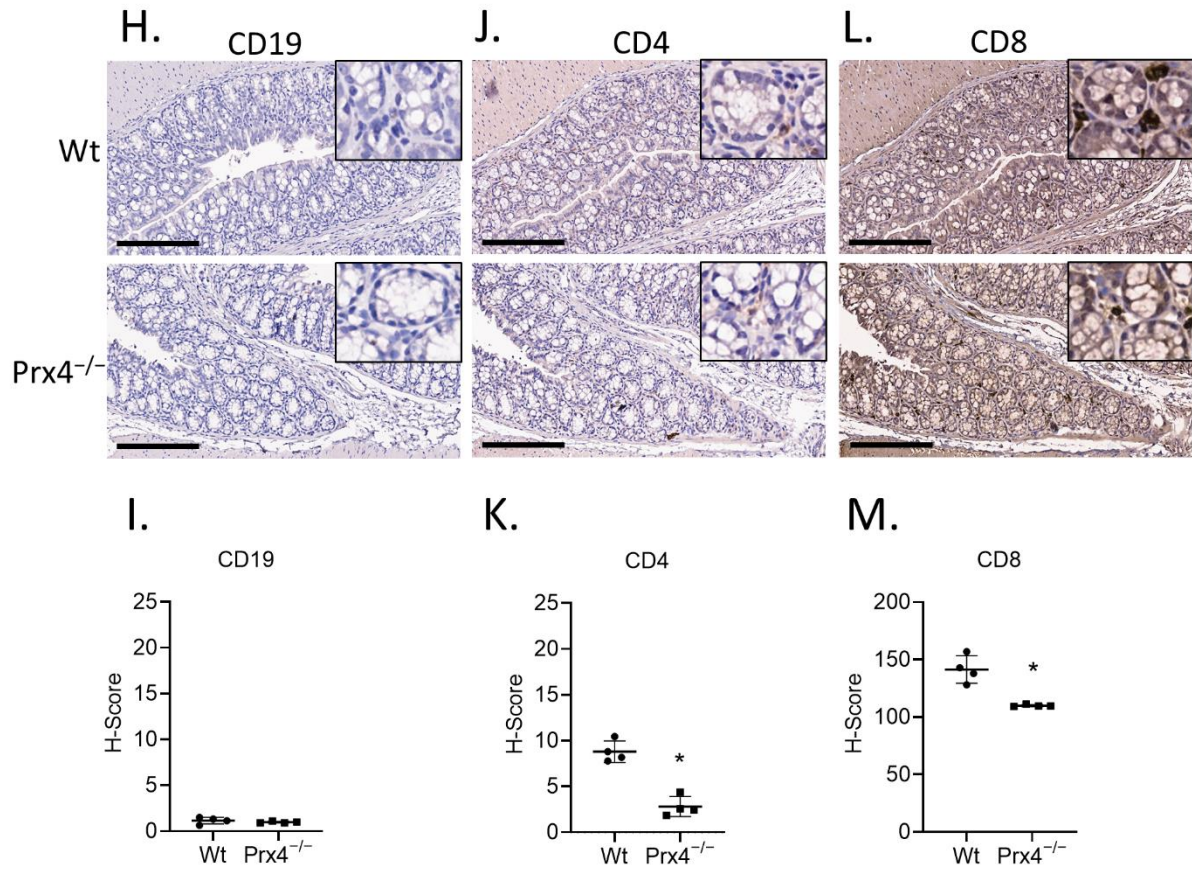

Figure S4. Prx4 knockout colons have lower immune cell infiltration compared to wildtype after DSS treatment. (A) Change to initial body weight of DSS-treated or untreated (control) wildtype and Prx4 knockout mice. Decreased macrophage infiltration in Prx4 knockout colon as indicated by staining of M1 macrophage marker CD86 (B and C) and M2 macrophage marker CD163 (D and E). (F and G) IHC staining of CD138 indicates lower presence of plasma cells in Prx4 knockout colon. (H and I) Comparable naïve B cells infiltration as indicated by staining of CD19. (J and K) Lower levels of CD4<sup>+</sup> staining was detected in Prx4 knockout compared to Wt. (L and M) IHC staining of CD8 shows decreased recruitment of cytotoxic T cells in Prx4KO group. Compared with Wt group, \* $p < 0.05$  (Student's t-test). Bar = 200  $\mu$ m
